# Supplementary material for: DNA damaging, cell cytotoxicity and serum albumin binding efficacy of the rutin–Cu( ii ) complex
Source: Royal Society of Chemistry journal article supplement (doi:10.1039/c6mb00161k), 2016-03-22
Supplement: c6mb00161k1.pdf [file c6mb00161k1.pdf]

## Supplementary Information

### DNA damaging, cell cytotoxicity and serum albumin binding efficacy of the rutin-Cu(II) complex

Atanu Singha Roy<sup>†, #, \*</sup>, Debi Ranjan Tripathy<sup>†</sup>, Sintu Samanta<sup>‡</sup>, Sudip K. Ghosh<sup>‡</sup> and Swagata Dasgupta<sup>†</sup>

<sup>†</sup>Department of Chemistry, Indian Institute of Technology, Kharagpur 721302, India

<sup>‡</sup>Department of Biotechnology, Indian Institute of Technology, Kharagpur 721302, India

<sup>#</sup>Present address: Department of Chemistry, National Institute of Technology, Meghalaya, Shillong 793003, India

#### 1. Synthesis and characterization of the rutin-Cu(II) complex

The procedure of synthesis and characterization of the rutin-Cu(II) complex has been described in the supplementary section of our recent publication.<sup>1</sup> The polyphenol to Cu(II) ratio estimated from the Job's plot based on UV-vis study is also provided in the same. The mass spectra (LRMS-ESI+) of the rutin-Cu(II) complex has been presented in Figure S1. The mass of the complex is  $m/z$  1318.37 for  $M^+$  and 1319.60 for  $(M+H^+)$  respectively, which supports the 2:1 rutin to Cu(II) ratio as obtained from the Job's method. The energy-optimized structure of the rutin-Cu(II) complex has been generated using density functional theory with the help of DMol3 (Figure 1). The DNP basis set with BLYP functional has been employed for the geometric optimization keeping the effective core potential on copper.<sup>2</sup>

#### References

1. D. R. Tripathy, A. Singha Roy, S. Dasgupta, *FEBS Lett.*, 2011, 585, 3270–3276.
2. K. S. Ghosh, B. K. Sahoo, D. Jana, S. Dasgupta, *J. Inorg. Biochem.*, 2008, 102, 1711–1718.

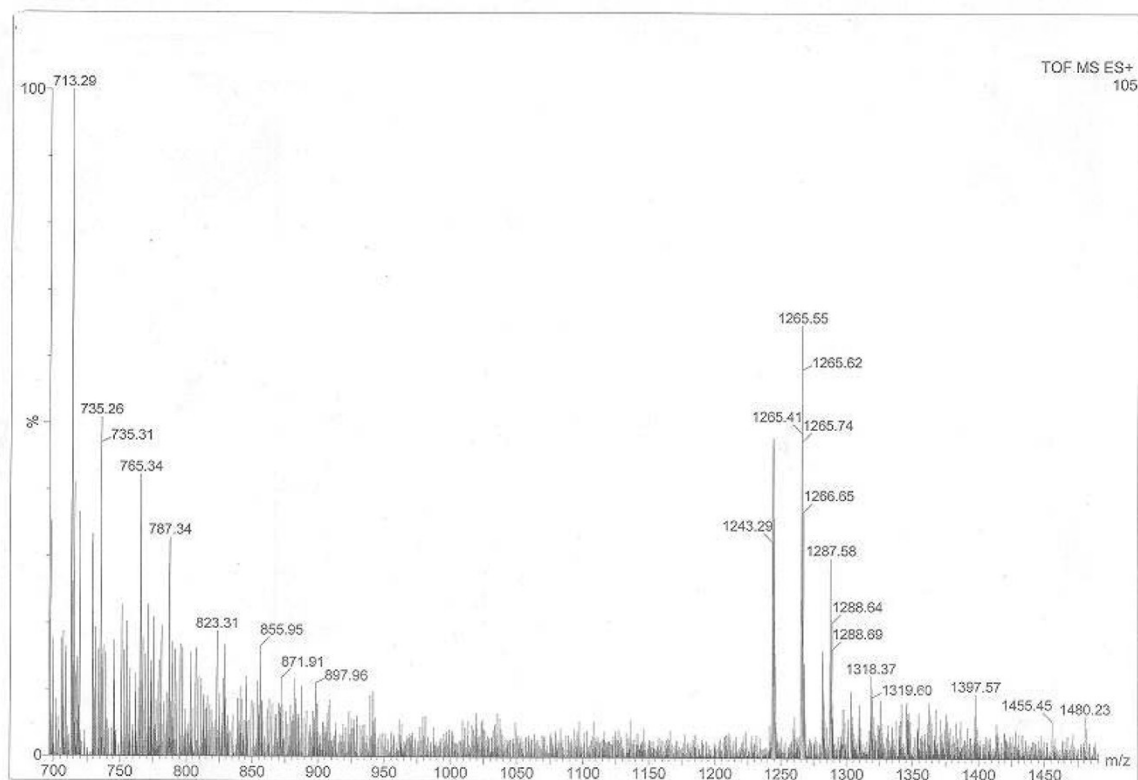

**Figure S1:** LRMS-ESI+ Mass spectra of the rutin-Cu(II) complex. Complex dissolved in acetonitrile.

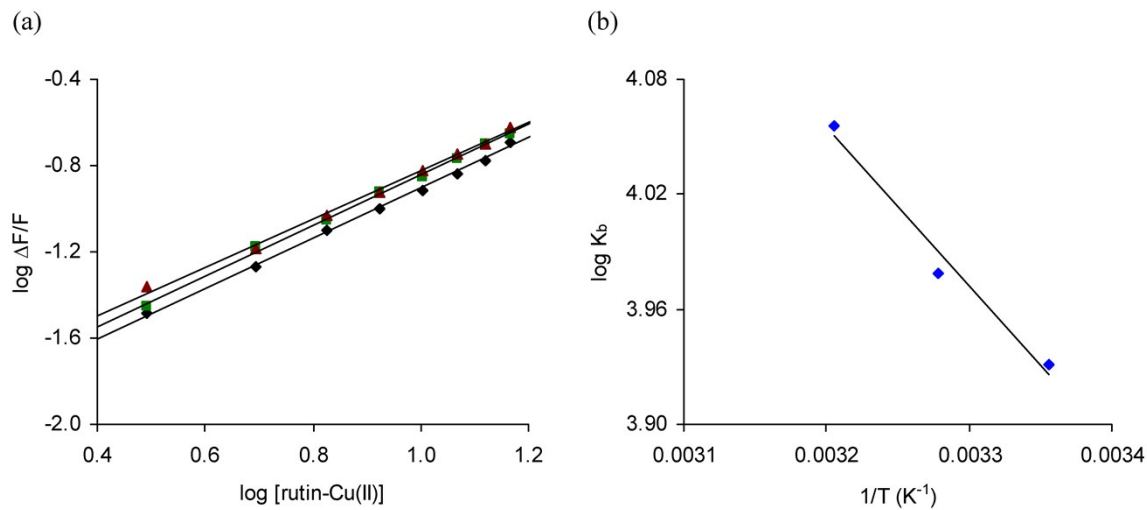

**Figure S2:** (a) The double-logarithm plots for the interaction of the rutin-Cu(II) complex with EB-ct-DNA at different temperatures and (b) the van't Hoff for the interaction of the complex with EB-ct-DNA. (♦) 298 K; (■) 305 K and (▲) 312 K;  $\lambda_{\text{ex}}$ : 480 nm.

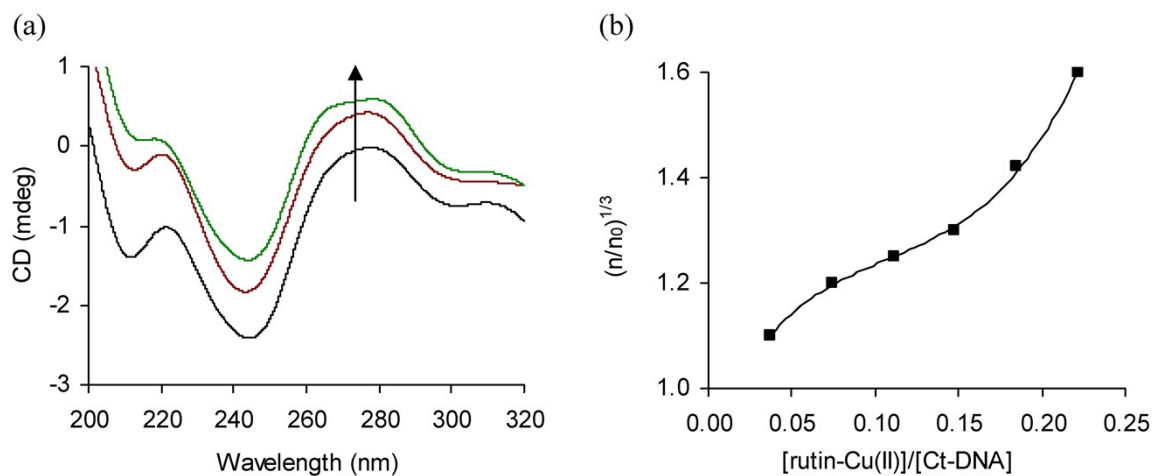

**Figure S3:** (a) CD spectra of ct-DNA (20 μM) in absence and presence of the rutin-Cu(II) complexes at different molar ratios (0 to 2 μM). (b) Changes in viscosity of ct-DNA (20 μM) after binding with rutin-Cu(II) complex at different molar ratios (0 to 5 μM).

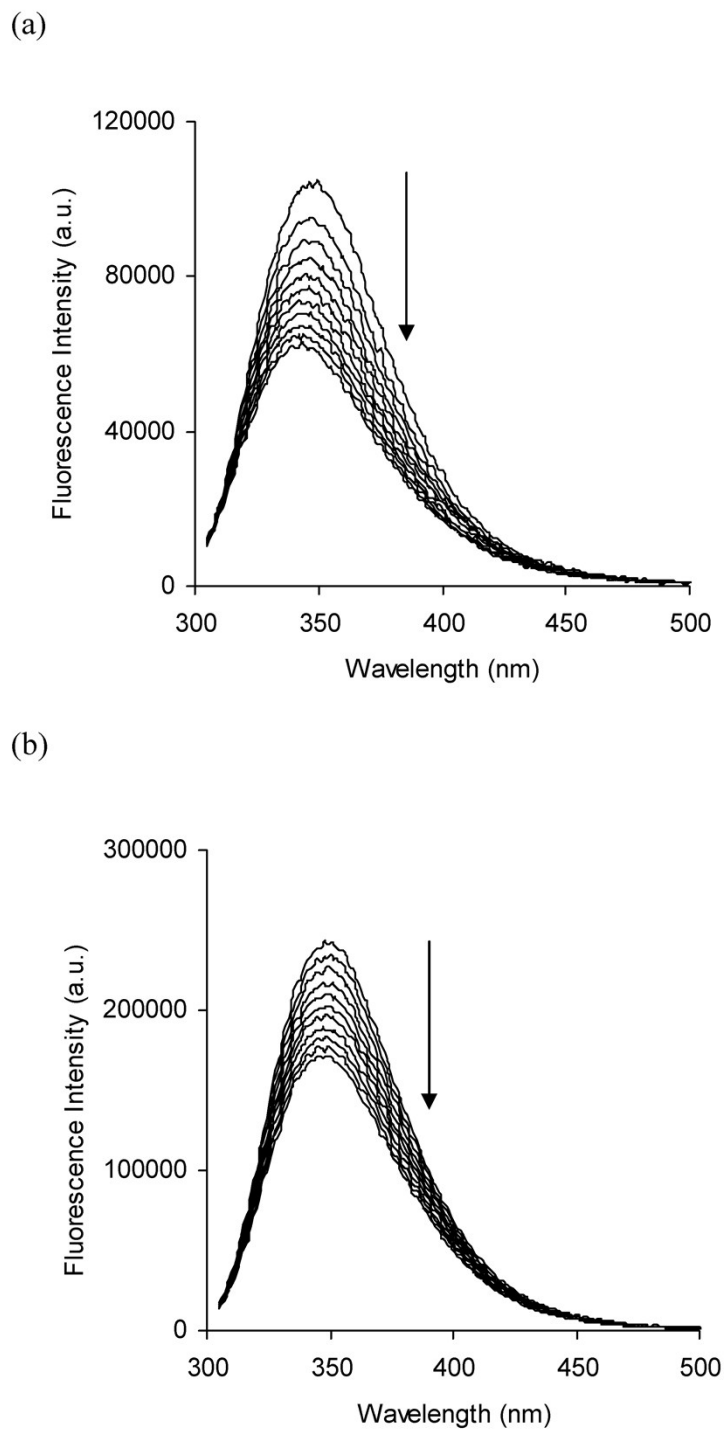

**Figure S4:** Fluorescence emission spectra of (a) HSA (2  $\mu\text{M}$ ) and (b) BSA (2  $\mu\text{M}$ ) in absence and presence of rutin (0 to 8  $\mu\text{M}$ ) in 20 mM phosphate buffer (pH 7.0) solution at 299 K;  $\lambda_{\text{ex}}$ : 295 nm. Arrows indicate the increasing ligand concentration.

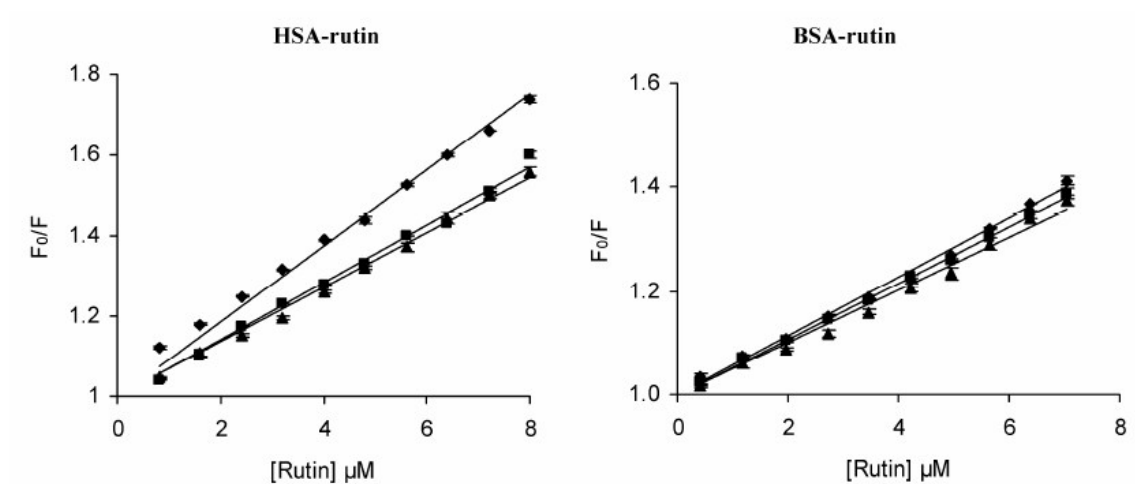

**Figure S5:** Stern-Volmer plots of HSA and BSA with increasing concentration of quercetin (0 to 8 and 7  $\mu\text{M}$  for HSA and BSA respectively). Inset: The linear range plots of the Stern-Volmer plots. ( $\blacklozenge$ ) 299 K; ( $\blacksquare$ ) 306 K; ( $\blacktriangle$ ) 312 K;  $\lambda_{\text{ex}} = 295 \text{ nm}$ .

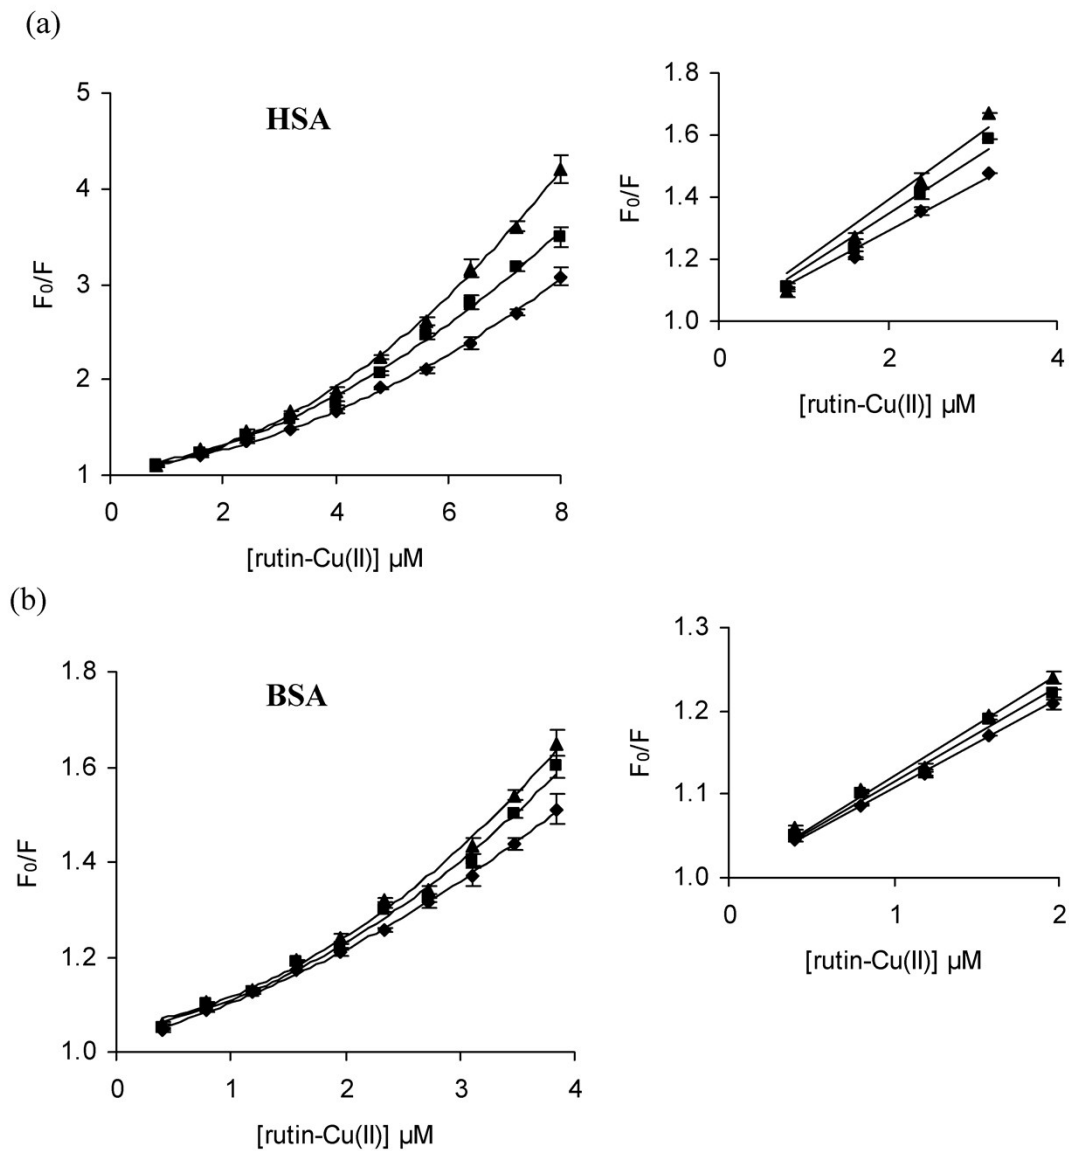

**Figure S6:** Stern-Volmer plots for the interaction of rutin-Cu(II) complex with (a) HSA and (b) BSA. Inset: The linear range plots. (♦) 299 K; (■) 306 K; (▲) 312 K;  $\lambda_{\text{ex}} = 295$  nm.

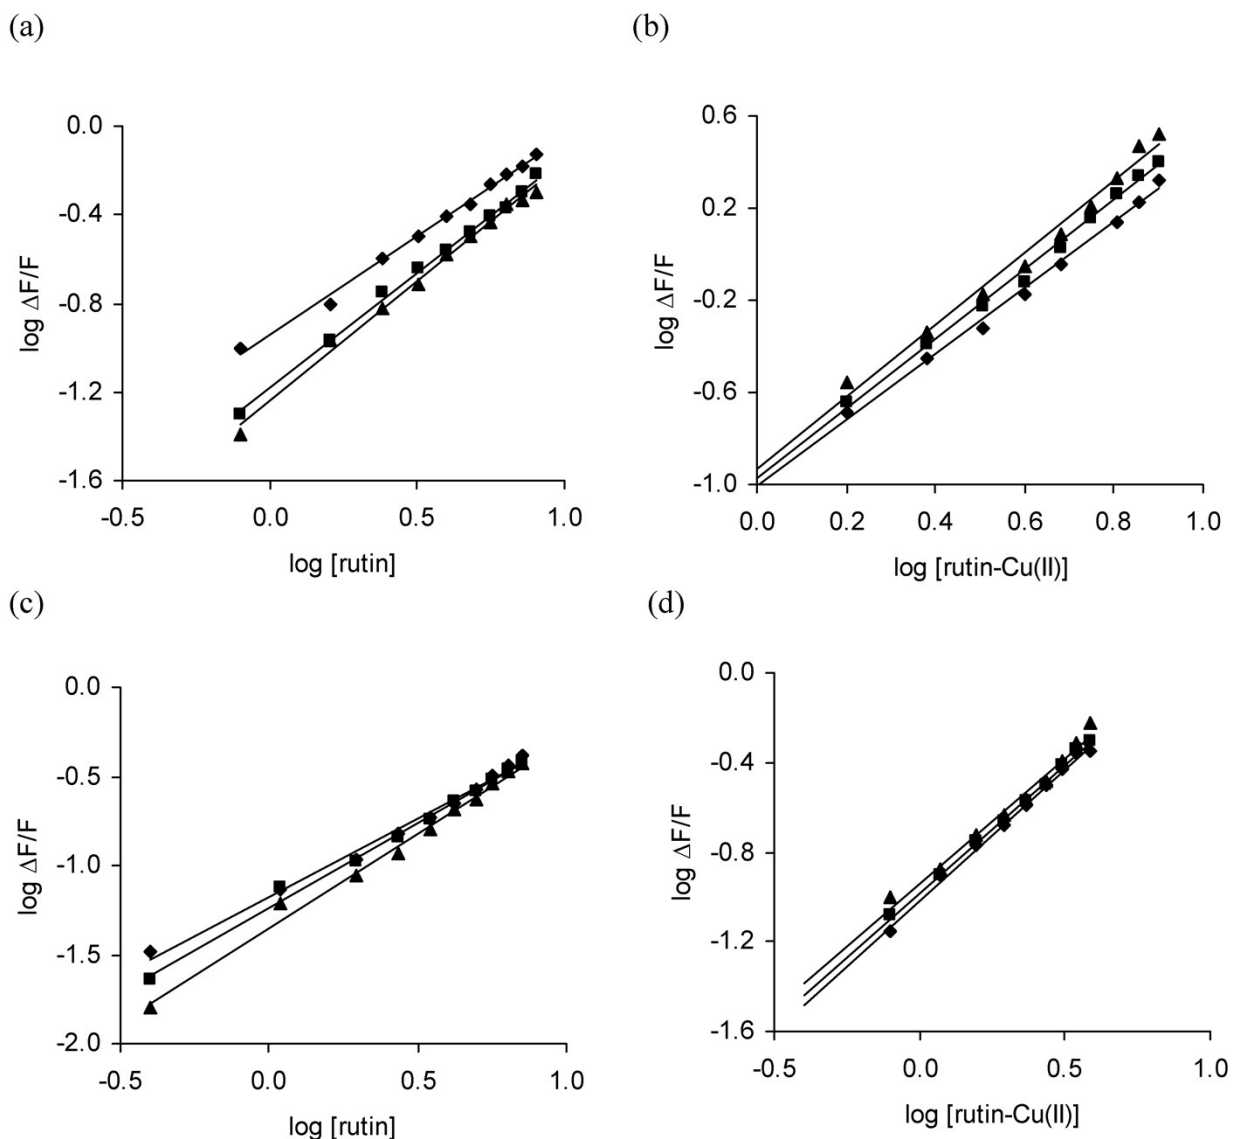

**Figure S7:** Double-logarithm plot of the interaction of the rutin and rutin-Cu(II) complex with HSA (a), (b) and BSA (c), (d). For rutin interacting with SAs (◆) 299 K; (■) 306 K; (▲) 312 K; For rutin-Cu(II) complex with SAs (▲) 299 K; (■) 306 K; (◆) 312 K  $\lambda_{\text{ex}} = 295 \text{ nm}$



(a)

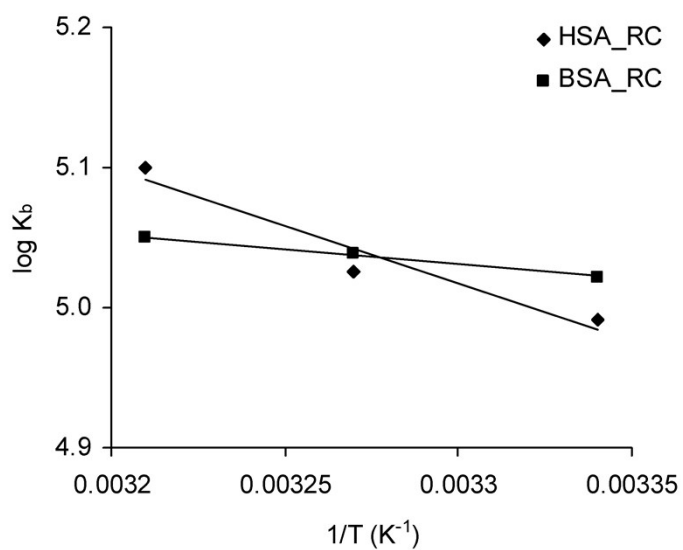

(b)

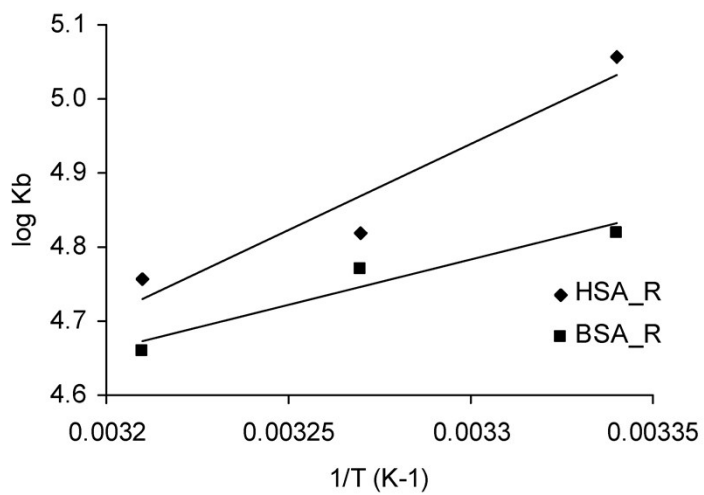

**Figure S8:** The van't Hoff plot for interactions of rutin-Cu(II) complex (a) and rutin (b) with HSA and BSA in 20 mM phosphate buffer (pH 7.0).

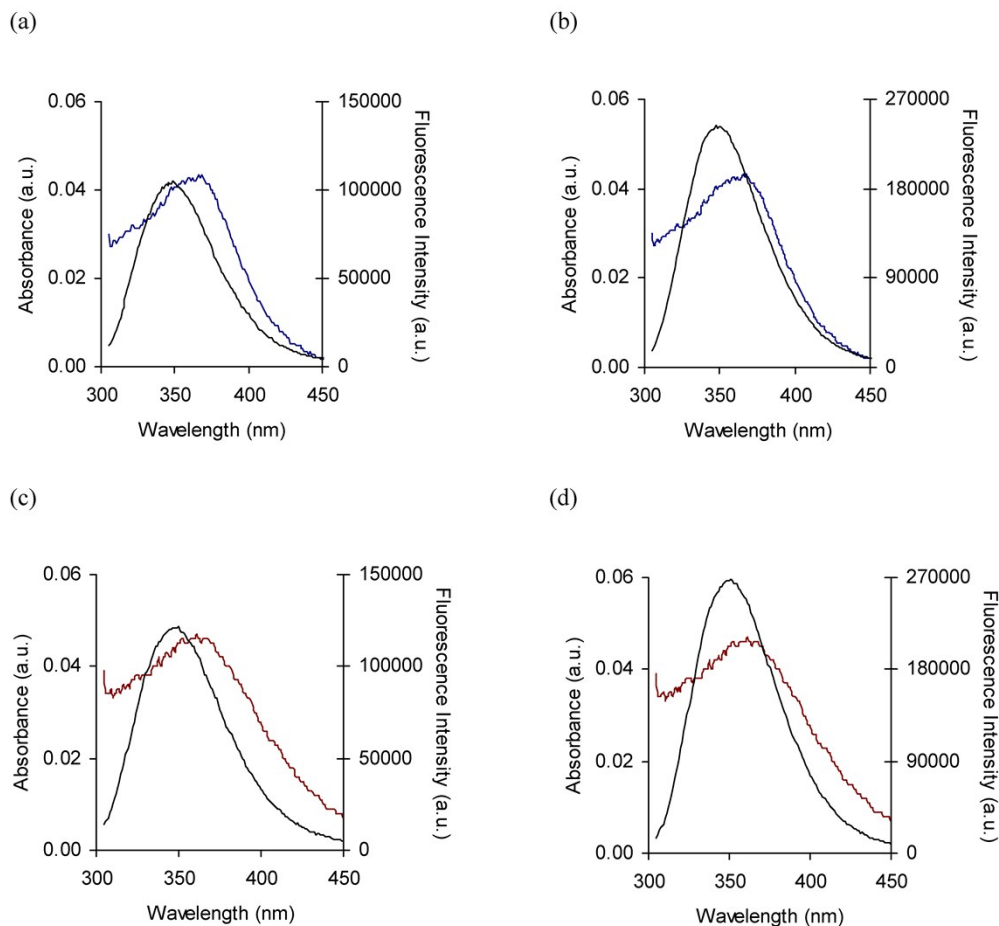

**Figure S9:** Spectral overlap between the fluorescence emission spectrum of SAs (solid line) and the absorption spectrum of ligands bound with SAs for (a) HSA-rutin, (b) BSA-rutin, (c) HSA-rutin-Cu(II), (d) BSA-rutin-Cu(II) at [ligand]/[protein]=1:1;  $\lambda_{\text{ex}}$ : 295 nm and  $\lambda_{\text{em}}$ : 347 nm.

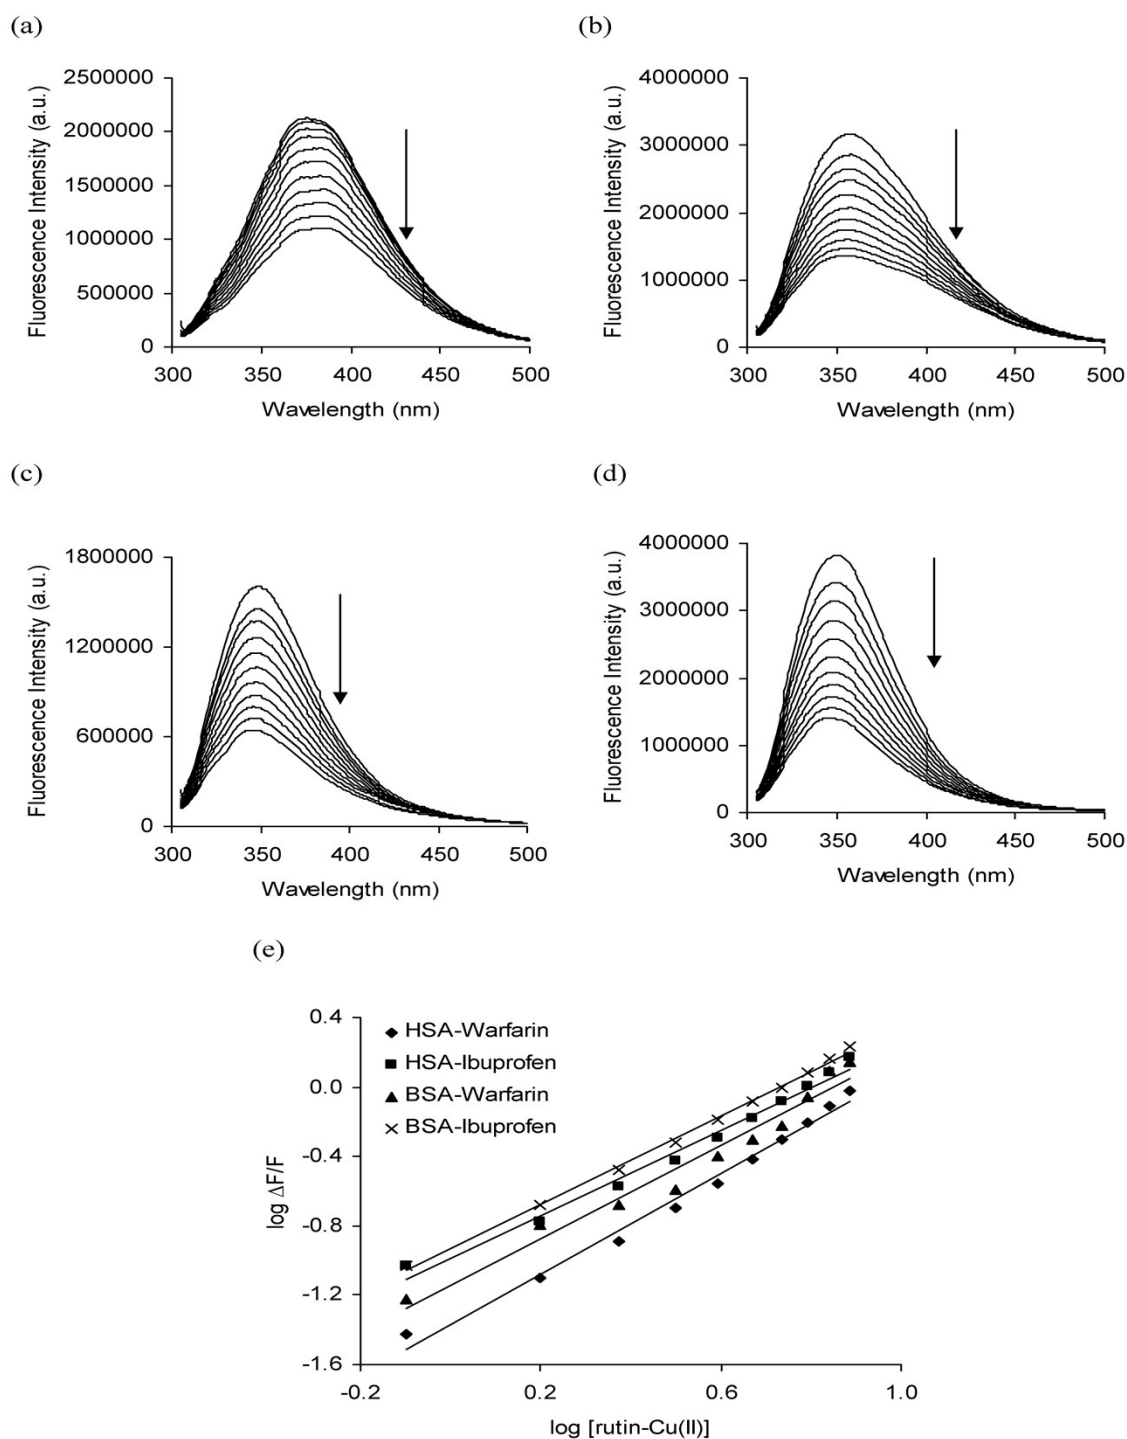

**Figure S10.** The fluorescence emission spectra of warfarin bound to HSA (a) and BSA (b) with increasing concentration of rutin-Cu(II) complex (0 to 8  $\mu\text{M}$ ). The same for ibuprofen bound to HSA (c) and BSA (d). The corresponding binding plots are given in (e).  $\lambda_{\text{ex}} = 295 \text{ nm}$ .

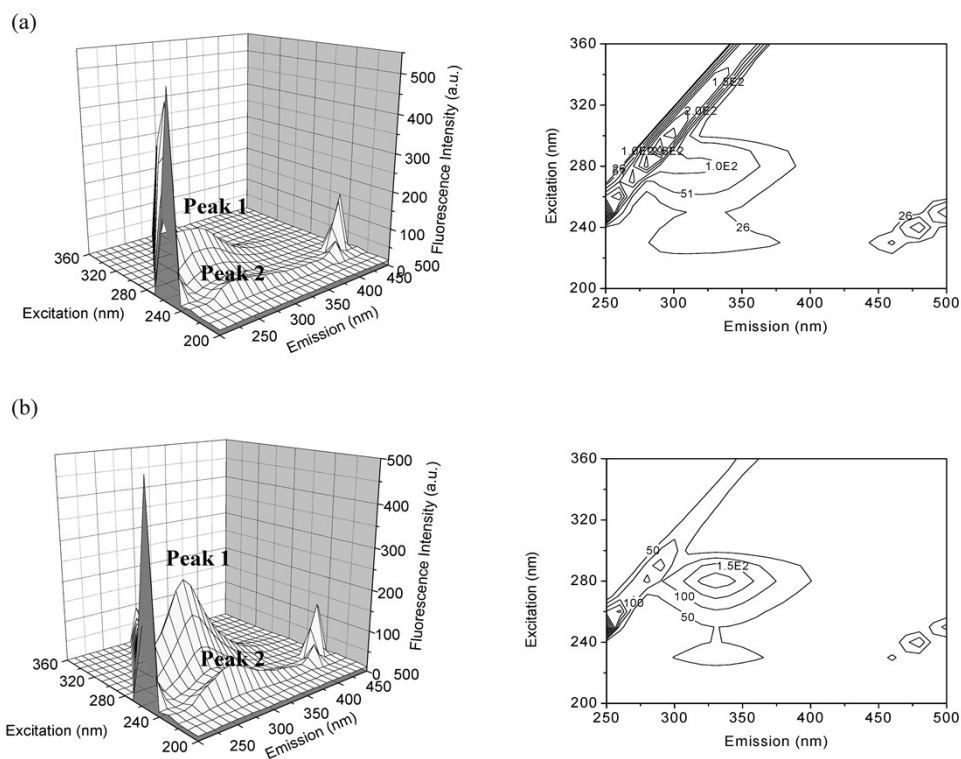

**Figure S11:** Three-dimensional spectra of HSA (a) and BSA (b) in presence of rutin (25  $\mu\text{M}$ ).

The contour plots of the corresponding three-dimensional diagrams are provided in the same row of each. [SAs] = 5  $\mu\text{M}$ .

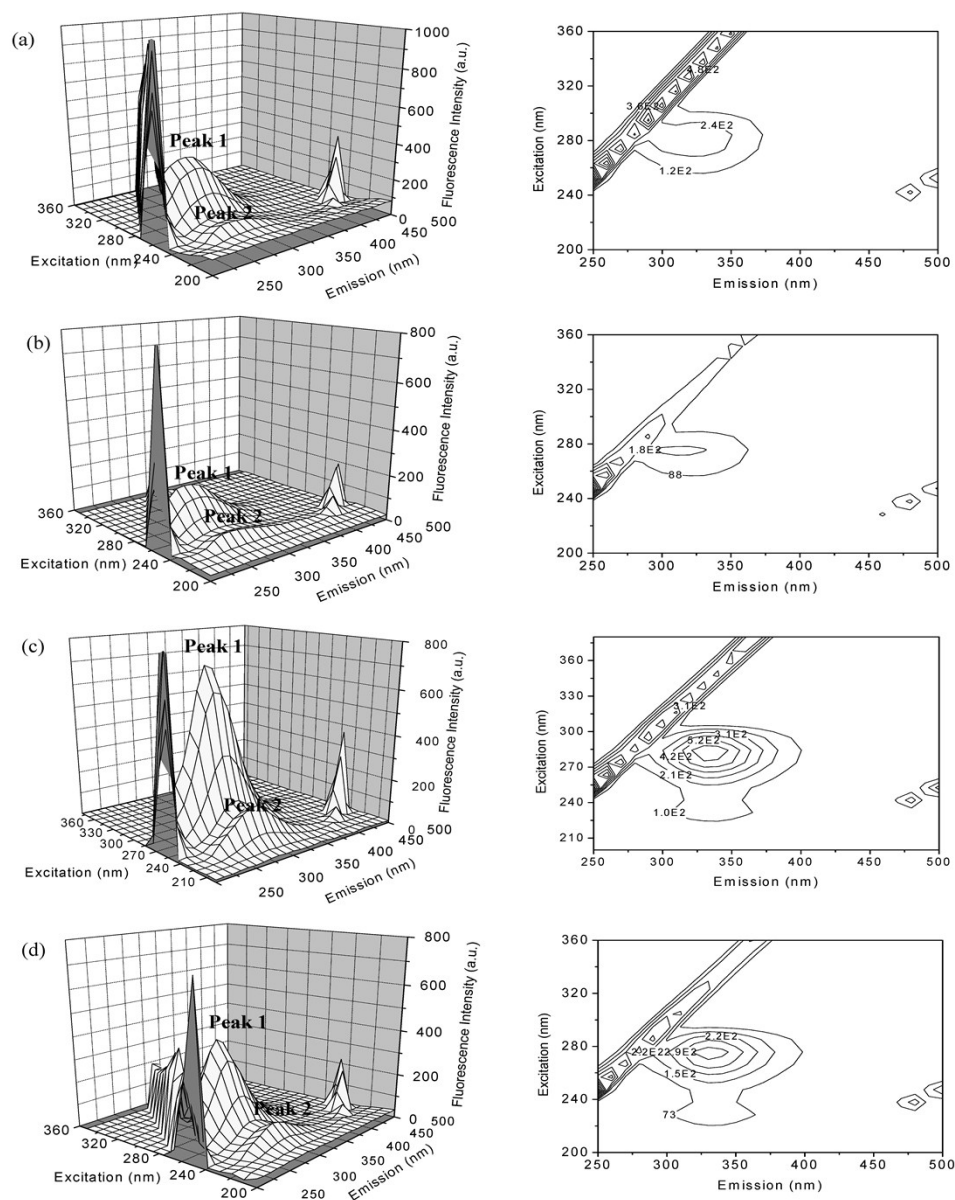

**Figure S12:** Three-dimensional spectra of HSA (5  $\mu\text{M}$ ) in (a) absence and (b) presence of rutin-Cu(II) complex (25  $\mu\text{M}$ ). The same for BSA in (c) absence and (d) presence of the copper complex. The contour plots of the corresponding three-dimensional diagrams are provided in the same row of each.

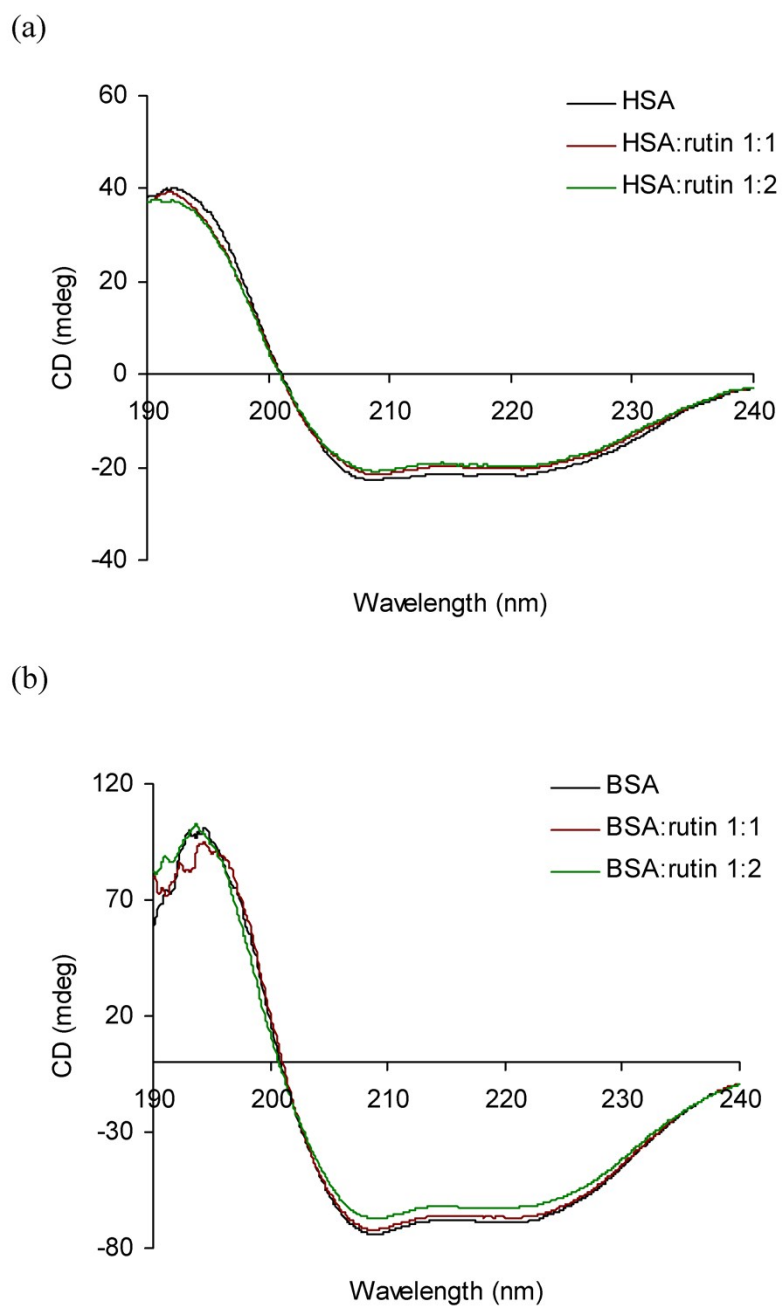

**Figure S13:** Far CD spectra of HSA + rutin (a) and BSA + rutin (b). Free protein (black line) and SAs:rutin (brown and green lines for 1:1 and 1:2 molar ratios respectively) in both cases. [HSA] = 2  $\mu$ M and [BSA] = 5  $\mu$ M.

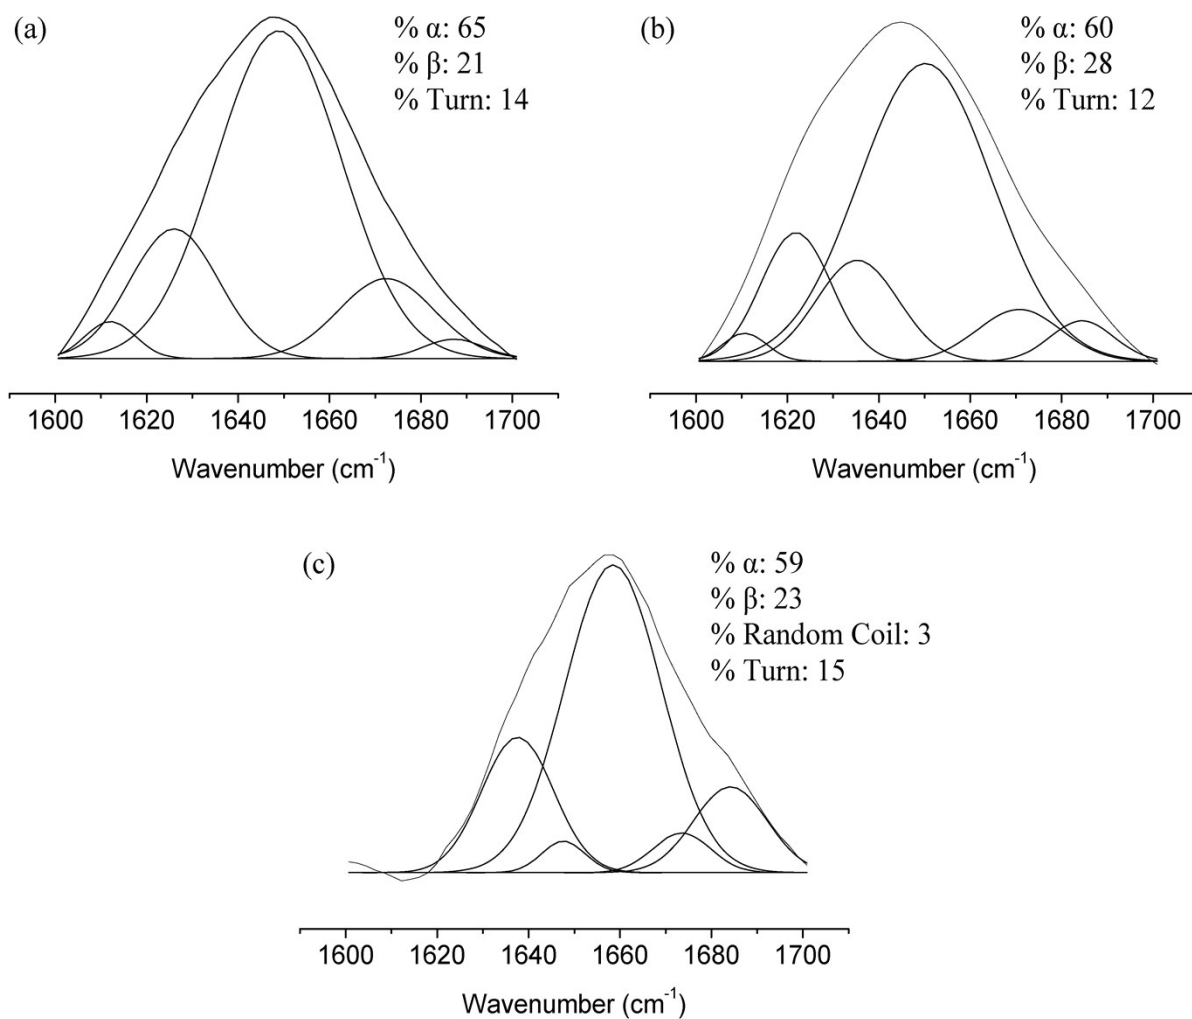

**Figure S14:** Curve-fitted amide I ( $1700\text{--}1600\text{ cm}^{-1}$ ) regions of free HSA (a) and HSA-rutin (b) and HSA-rutin-Cu(II) (c) complexes (molar ratio 1:2) in 20 mM phosphate buffer of pH 7.0.

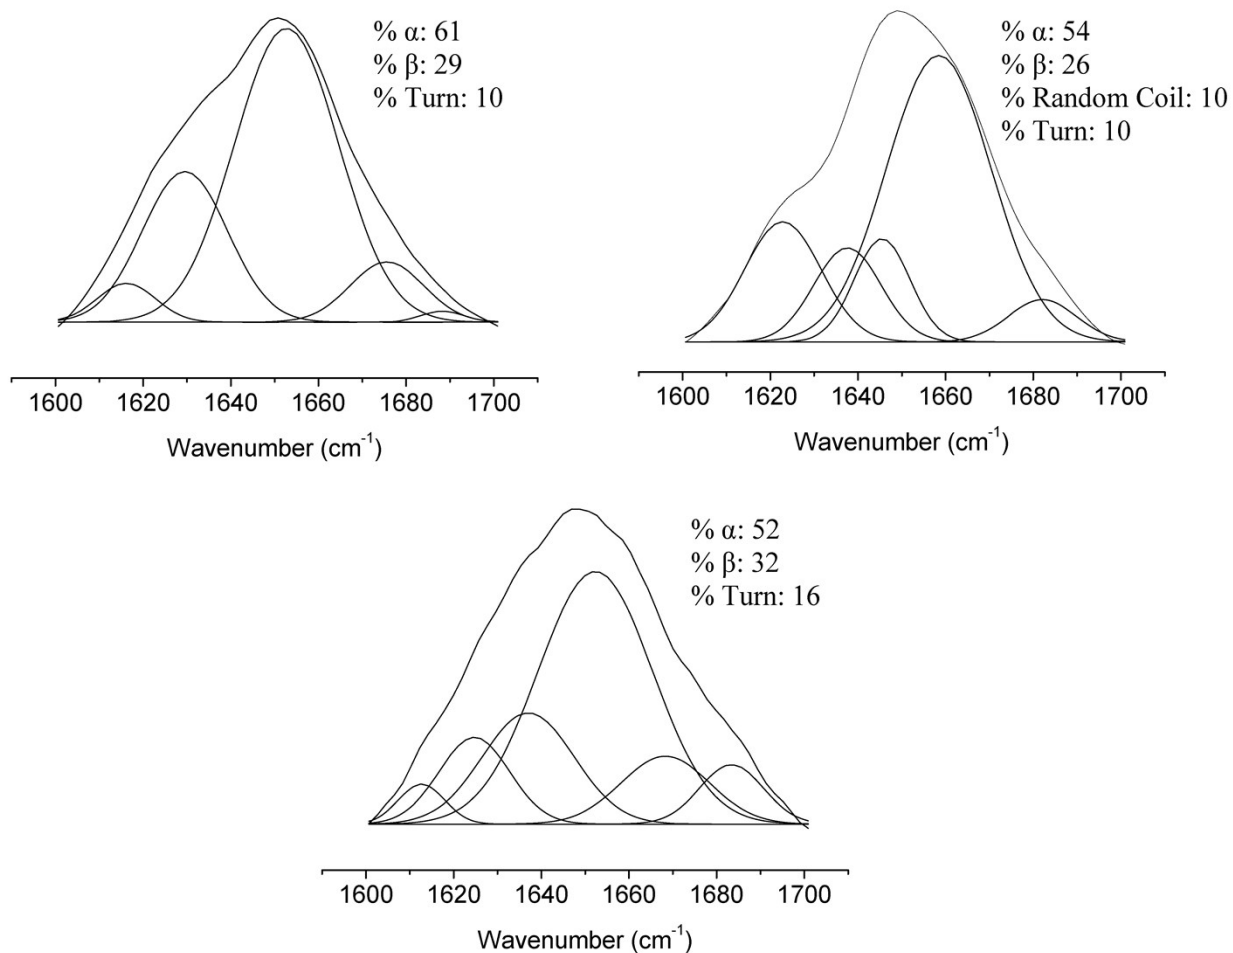

**Figure S15:** Curve-fitted amide I (1700-1600 cm<sup>-1</sup>) regions of free BSA (a) and BSA-rutin (b) and BSA-rutin-Cu(II) (c) complexes (molar ratio 1:2) in 20 mM phosphate buffer of pH 7.0.



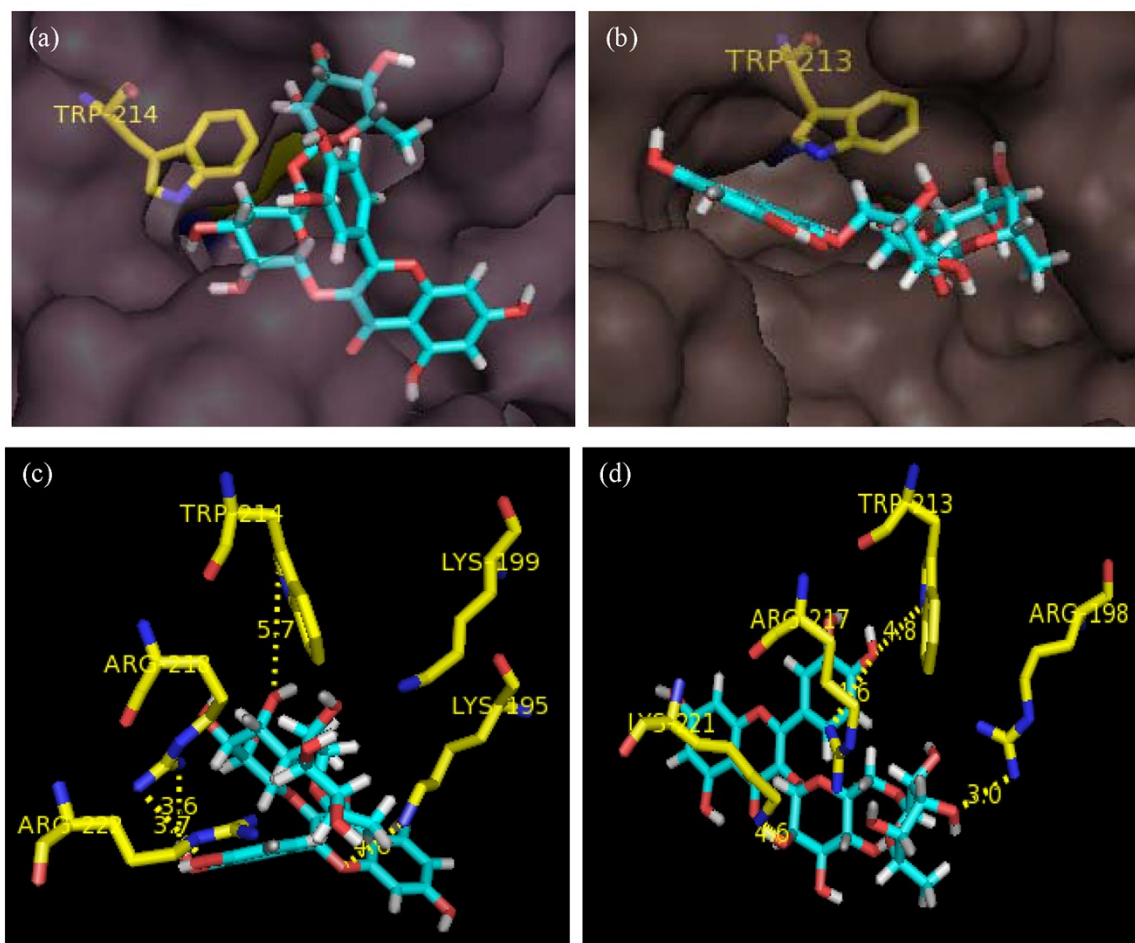

**Figure S16:** The surface representation of the docked conformations of rutin with HSA (a) and BSA (b); The H-bonding distances of rutin from the interacting residues of HSA (c) and BSA (d).

(a)

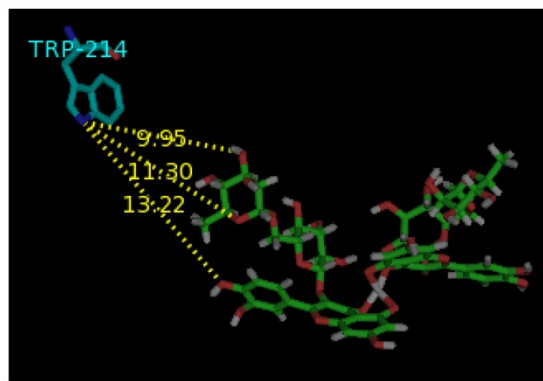

(b)

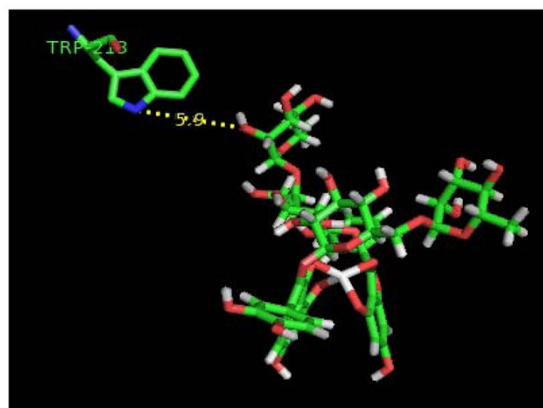

**Figure S17:** The H-bonding distances of rutin-Cu(II) complex from the Trp 214 and Trp 213 residues of HSA (a) and BSA (b).

**Table S1.** The quenching parameters for the interaction of the rutin-Cu(II) complex with ct-DNA

| Temp. | $10^{-4} \times K_{sv} \text{ (M}^{-1}\text{)}$ | $10^{-12} \times K_q \text{ (M}^{-1} \text{s}^{-1}\text{)}$ |
|-------|-------------------------------------------------|-------------------------------------------------------------|
| 25 °C | 1.16±0.02                                       | 2.32                                                        |
|       | (R <sup>2</sup> = 0.9777)                       |                                                             |
| 32 °C | 1.37±0.01                                       | 2.74                                                        |
|       | (R <sup>2</sup> = 0.9873)                       |                                                             |
| 38 °C | 1.56±0.01                                       | 3.12                                                        |
|       | (R <sup>2</sup> = 0.9813)                       |                                                             |

**Table S2.**  $K_{SV}$  and  $K_q$  values for the binding of the rutin (column 1 and 2) and rutin-Cu(II) complex (column 3 and 4) with HSA and BSA

|     | Temp. | $10^{-4} \times K_{SV} (M^{-1})$     | $10^{-13} \times K_q (M^{-1} s^{-1})$ | $10^{-5} \times K_{SV} (M^{-1})$     | $10^{-13} \times K_q (M^{-1} s^{-1})$ |
|-----|-------|--------------------------------------|---------------------------------------|--------------------------------------|---------------------------------------|
| HSA | 299 K | 9.39±0.01<br>(R <sup>2</sup> =0.987) | 1.88                                  | 1.45±0.02<br>(R <sup>2</sup> =0.965) | 2.90                                  |
|     | 306K  | 7.11±0.02<br>(R <sup>2</sup> =0.992) | 1.42                                  | 1.73±0.03<br>(R <sup>2</sup> =0.968) | 3.46                                  |
|     | 312 K | 6.81±0.01<br>(R <sup>2</sup> =0.995) | 1.36                                  | 1.95±0.02<br>(R <sup>2</sup> =0.987) | 3.90                                  |
| BSA | 299 K | 5.66±0.01<br>(R <sup>2</sup> =0.995) | 1.13                                  | 1.07±0.01<br>(R <sup>2</sup> =0.983) | 2.44                                  |
|     | 306 K | 5.39±0.01<br>(R <sup>2</sup> =0.998) | 1.08                                  | 1.15±0.01<br>(R <sup>2</sup> =0.982) | 2.30                                  |
|     | 312 K | 5.07±0.02<br>(R <sup>2</sup> =0.986) | 1.01                                  | 1.22±0.01<br>(R <sup>2</sup> =0.998) | 2.14                                  |

**Table S3.** Thermodynamic parameters for the interactions of rutin with HSA and BSA

|           | Temp. | $\Delta G^\circ$ (kJ mol <sup>-1</sup> ) | $\Delta H^\circ$ (kJ mol <sup>-1</sup> ) | $\Delta S^\circ$ (J mol <sup>-1</sup> K <sup>-1</sup> ) |
|-----------|-------|------------------------------------------|------------------------------------------|---------------------------------------------------------|
| HAS/Rutin | 299 K | -(28.81±0.06)                            | -(42.07±2.92)                            | -(44.31±4.85)                                           |
|           | 306 K | -(28.51±0.13)                            |                                          |                                                         |
|           | 312 K | -(28.24±0.19)                            |                                          |                                                         |
| BSA/Rutin | 299 K | -(27.69±0.18)                            | -(23.29±2.33)                            | +(14.71±4.95)                                           |
|           | 306 K | -(27.79±0.24)                            |                                          |                                                         |
|           | 312 K | -(27.88±0.29)                            |                                          |                                                         |

**Table S4.** The %  $\alpha$ -helix data of HSA and BSA after interactions with rutin and rutin-Cu(II) complex

| Protein                      | [Protein]/[ligand] | % $\alpha$ -helix<br>(CD) | % $\alpha$ -helix<br>(FTIR) |
|------------------------------|--------------------|---------------------------|-----------------------------|
| HSA/Rutin                    | 1:0                | 54                        | 65                          |
|                              | 1:1                | 52                        | 63                          |
|                              | 1:2                | 51                        | 60                          |
| HSA/Rutin-<br>Cu(II) complex | 1:0                | 54                        | 65                          |
|                              | 1:1                | 52                        | 62                          |
|                              | 1:2                | 50                        | 59                          |
| BSA/Rutin                    | 1:0                | 61                        | 61                          |
|                              | 1:1                | 59                        | 58                          |
|                              | 1:2                | 57                        | 54                          |
| BSA/Rutin-<br>Cu(II) complex | 1:0                | 61                        | 61                          |
|                              | 1:1                | 58                        | 57                          |
|                              | 1:2                | 56                        | 52                          |

**Table S5.** The change in accessible surface area ( $\Delta ASA$ ) in  $\text{\AA}^2$  of the interacting residues of HSA (uncomplexed), and their complexes with the rutin-Cu(II)

| Residues | Helix   | $\Delta ASA$ ( $\text{\AA}^2$ ) |
|----------|---------|---------------------------------|
| LYS 195  |         | -                               |
| TRP 214  | IIA-h2  | -                               |
| ARG 218  | IIA-h2  | 35.16                           |
| ARG 222  | IIA-h2  | 20.24                           |
| GLU 277  |         | 5.27                            |
| LYS 281  |         | 45.62                           |
| HIS 288  | IIA-h6  | 34.46                           |
| CYS 289  | IIA-h6  | 21.95                           |
| GLU 292  | IIA-h6  | 72.01                           |
| VAL 293  |         | 23.45                           |
| GLU 294  |         | 44.05                           |
| LYS 436  | IIIA-h3 | 14.83                           |
| HIS 440  | IIIA-h3 | 9.77                            |
| LYS 444  | IIIA-h3 | 26.25                           |
| PRO 447  | IIIA-h3 | 23.91                           |

**Table S6.** The change in accessible surface area ( $\Delta ASA$ ) in  $\text{\AA}^2$  of the interacting residues of HSA (uncomplexed), and their complexes with rutin

| Residues | Helix   | $\Delta ASA$ ( $\text{\AA}^2$ ) |
|----------|---------|---------------------------------|
| LYS 195  |         | 71.83                           |
| TRP 214  | IIA-h2  | 28.28                           |
| ARG 218  | IIA-h2  | 39.59                           |
| ARG 222  | IIA-h2  | 34.13                           |
| LEU 238  | IIA-h3  | 10.04                           |
| ALA 291  | IIA-h6  | 20.4                            |
| GLU 292  | IIA-h2  | 33.94                           |
| VAL 293  |         | 8.11                            |
| GLU 294  |         | 3.48                            |
| ASN 295  |         | 12.18                           |
| PRO 447  | IIIA-h3 | 10.96                           |
| CYS 448  | IIIA-h3 | 19.07                           |
| ASP 451  | IIIA-h3 | 21.6                            |
| TYR 452  | IIIA-h3 | 20.89                           |



**Table S7.** The change in accessible surface area ( $\Delta ASA$ ) in  $\text{\AA}^2$  of the interacting residues of BSA (uncomplexed), and their complexes with the rutin-Cu(II)

| Residues | Helix   | $\Delta ASA$ ( $\text{\AA}^2$ ) |
|----------|---------|---------------------------------|
| LYS 187  |         | 54.81                           |
| THR 190  |         | 13.71                           |
| SER 191  | IB-h4   | 17.95                           |
| ARG 194  | IB-h4   | 52.79                           |
| ARG 198  |         | 24.42                           |
| TRP 213  | IIA-h2  |                                 |
| ARG 217  | IIA-h2  | 54.52                           |
| HIS 287  | IIA-h5  | 11.55                           |
| CYS 288  | IIA-h5  | 14.19                           |
| ALA 290  | IIA-h6  | 35.18                           |
| GLU 291  | IIA-h6  | 99.01                           |
| VAL 292  | IIA-h6  | 16.61                           |
| GLU 293  |         | 56.22                           |
| LYS 294  |         | 29.72                           |
| ARG 435  | IIIA-h3 | 13.32                           |
| LYS 439  |         | 40.37                           |
| GLU 443  |         | 60.03                           |
| TYR 451  | IIIA-h3 | 29.45                           |

**Table S8.** The change in accessible surface area ( $\Delta ASA$ ) in  $\text{\AA}^2$  of the interacting residues of BSA (uncomplexed), and their complexes with the rutin

| Residues | Helix   | $\Delta ASA$ ( $\text{\AA}^2$ ) |
|----------|---------|---------------------------------|
| ARG 194  |         | 63.97                           |
| ARG 198  |         | 21.51                           |
| TRP 213  | IIA-h2  | 9.92                            |
| ARG 217  | IIA-h2  | 68.94                           |
| ALA 290  | IIA-h6  | 28.73                           |
| GLU 291  | IIA-h6  | 33.74                           |
| LYS 294  |         | 35.33                           |
| GLU 339  |         | 18.67                           |
| VAL 342  |         | 23.22                           |
| GLU 443  |         | 40.04                           |
| PRO 446  | IIIA-h3 | 14.73                           |
| ASP 450  | IIIA-h3 | 36.01                           |
